# Supplementary material for: Glucosinolates from pak choi and broccoli induce enzymes and inhibit inflammation and colon cancer differently
Source: Royal Society of Chemistry journal article supplement (doi:10.1039/c3fo60676g), 2014-01-01

### A Scoring of the disease activity index (DAI)

| Weight loss index <sup>1</sup> | Visible fecal blood [days] | Diarrhea [days] | Score (sum of 3 parameters) |
|--------------------------------|----------------------------|-----------------|-----------------------------|
| < 3                            | 0                          | 0               | <b>0 (0)</b>                |
| 3-10                           | 1-3                        | 1-3             | <b>1 (3)</b>                |
| 11-18                          | 4-6                        | 4-6             | <b>2 (6)</b>                |
| > 18                           | > 6                        | > 6             | <b>3 (9)</b>                |

### B Total inflammation score

| Parameter                                             | Score        |
|-------------------------------------------------------|--------------|
| <b>DAI:</b>                                           |              |
| - weight loss                                         | 0-3          |
| - fecal blood                                         | 0-3          |
| - diarrhea                                            | 0-3          |
| <b>Colon macroscopy</b><br>(swelling and shortening): | 0-3.5:       |
| - no                                                  | 0            |
| - weak                                                | 1            |
| - weak to moderate                                    | 1.5          |
| - moderate                                            | 2            |
| - moderate to strong                                  | 2.5          |
| - strong                                              | 3            |
| - very strong                                         | 3.5          |
| <b>Histological parameters:</b>                       |              |
| - edema of mucosa                                     | no/yes (0/1) |
| - hemorrhage                                          | no/yes (0/1) |
| - disturbed crypt architecture                        | no/yes (0/1) |
| - loss of mucosa                                      | 0-3          |
| - inflammatory infiltration                           | 0-3          |
|                                                       | <b>21.5</b>  |

### C H&E staining of colonic Swiss rolls

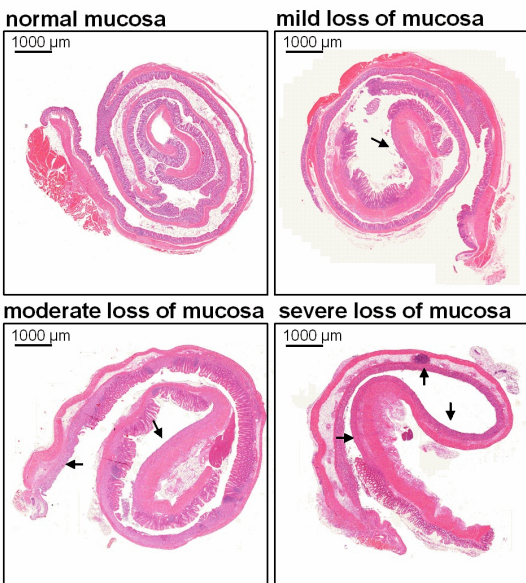

Supplement: c3fo60676g1.pdf [file c3fo60676g1.pdf]
